# Supplementary material
Source: HighWire-hosted journal article supplement (https://www.jpn.ca/highwire/filestream/89566/field_highwire_adjunct_files/0/jpn-160215-1-at.pdf)
Supplement: jpn-160215-1-at.pdf [file jpn-160215-1-at.pdf]

**Appendix 1** to Fullana M, Zhu X, Alonso P, et al. Basolateral amygdala–ventromedial prefrontal cortex connectivity predicts cognitive behavioural therapy outcome in adults with obsessive–compulsive disorder. *J Psychiatry Neurosci* 2017.

DOI: 10.1503/jpn.160215

Copyright © 2017 The Author(s) or their employer(s). To receive this resource in an accessible format, please contact us at [cmajgroup@cmaj.ca](mailto:cmajgroup@cmaj.ca).

*Online appendices are unedited and posted as supplied by the authors.*

**Supplementary Table 1. Sociodemographic and clinical characteristics of CBT responders and non-responders**

|                                                     | <b>CBT responders<br/>(n=35)</b> | <b>CBT non-responders<br/>(n=38)</b> | <b><i>t</i>/<math>\chi^2</math></b> | <b><i>P</i></b> |
|-----------------------------------------------------|----------------------------------|--------------------------------------|-------------------------------------|-----------------|
| <b>Mean age, years (<i>SD</i>)</b>                  | 34.11 (9.76)                     | 34.24 (8.88)                         | .05                                 | .956            |
| <b>Mean age at OCD onset, years (<i>SD</i>)</b>     | 23.20 (7.54)                     | 20.32 (7.29)                         | -1.66                               | .101            |
| <b>Mean duration of education years (<i>SD</i>)</b> | 12.24 (3.16)                     | 12.57 (3)                            | -.46                                | .645            |
| <b>Gender, male, n (%)</b>                          | 14 (40)                          | 21(55)                               | 1.70                                | .192            |
| <b>Comorbidity</b>                                  |                                  |                                      |                                     |                 |
| <b>Affective disorders, n (%)</b>                   | 4                                | 8                                    | 1.22                                | .268            |
| Major depressive disorder, n                        | 2                                | 3                                    |                                     |                 |
| Dysthymia, n                                        | 2                                | 2                                    |                                     |                 |
| Depressive disorder not otherwise specified, n      | 0                                | 3                                    |                                     |                 |
| <b>Anxiety disorders, n (%)</b>                     | 3                                | 6                                    | .878                                | .349            |
| Social phobia, n                                    | 1                                | 3                                    |                                     |                 |
| Panic disorder, n                                   | 1                                | 2                                    |                                     |                 |
| Generalized anxiety disorder, n                     | 1                                | 1                                    |                                     |                 |
| <b>Tic disorders, n (%)</b>                         | 3                                | 4                                    | 0.08                                | .777            |
| <b>Mean HDRS baseline (<i>SD</i>)</b>               | 8.29 (3.21)                      | 9.63 (4.07)                          | 1.55                                | .123            |
| <b>Mean YBOCS baseline (<i>SD</i>)</b>              | 20.43 (4.88)                     | 23.68 (4.81)                         | 2.86                                | .005            |
| <b>Pharmacological treatment *, n (%)</b>           | 35 (100%)                        | 38 (100%)                            |                                     |                 |
| Fluoxetine 60-80 mg/day, n (%)                      | 19 (54%)                         | 17 (44%)                             | .66                                 | .415            |
| Fluvoxamine 200-300 mg/day, n (%)                   | 7 (20%)                          | 9 (24%)                              | .14                                 | .704            |
| Escitalopram 20-40 mg/day, n (%)                    | 5 (14%)                          | 5 (13%)                              | .02                                 | .889            |
| Clomipramine 225-300 mg/day, n (%)                  | 4 (11%)                          | 7 (18%)                              | .69                                 | .404            |
| Hypnotic benzodiazepines, n (%)                     | 11 (31%)                         | 13 (34%)                             | .06                                 | .800            |

CBT, Cognitive-behavior therapy; *SD*, standard deviation; OCD, Obsessive-compulsive disorder; HDRS, Hamilton Depression Rating Scale; YBOCS, Yale–Brown Obsessive-Compulsive Scale.

\* At least 12 weeks at this dose was required before scanning and initiating CBT. Medication was kept at a stable dose throughout the study.

**Appendix 1** to Fullana M, Zhu X, Alonso P, et al. Basolateral amygdala–ventromedial prefrontal cortex connectivity predicts cognitive behavioural therapy outcome in adults with obsessive–compulsive disorder. *J Psychiatry Neurosci* 2017.

DOI: 10.1503/jpn.160215

*Online appendices are unedited and posted as supplied by the authors.*

**Supplementary Table 2. Regression models predicting CBT outcome in OCD patients (n=73) with CMA-vmPFC rs-fc as predictor**

Outcome: CBT response (yes/no). Binomial logistic regression model

| Predictors      | Wald  | OR    | P    | 95% CI     |
|-----------------|-------|-------|------|------------|
| Sex             | 2.536 | 1.133 | .111 | .972-1.322 |
| Age             | .122  | 1.002 | .727 | .993-1.010 |
| YBOCS baseline  | 4.451 | .980  | .035 | .962-.999  |
| HDRS baseline   | .077  | .997  | .782 | .972-1.022 |
| CMA-vmPFC rs-fc | 1.956 | .675  | .162 | .371-1.171 |

Outcome: Post-CBT YBOCS. Multiple regression model

| Predictors      | B     | t      | P     | 95% CI       |
|-----------------|-------|--------|-------|--------------|
| Sex             | -.302 | -2.140 | .036  | -.585- -.020 |
| Age             | .002  | .248   | .805  | -.138-.018   |
| YBOCS baseline  | .144  | 8.518  | <.001 | .110-.177    |
| HDRS baseline   | .004  | .182   | .856  | -.042-.050   |
| CMA-vmPFC rs-fc | 1.220 | 2.518  | .014  | .253-2.187   |

CBT, Cognitive-behavior therapy; OCD, Obsessive-compulsive disorder; YBOCS, Yale–Brown Obsessive-Compulsive Scale; HDRS, Hamilton Depression Rating Scale ; CMA-vmPFC rs-fc, Centromedial amygdala-ventromedial prefrontal cortex resting-state functional connectivity; OR, odds ratio.

\*OR and multiple regression coefficients are reported for one standard deviation increase in the predictor

**Appendix 1** to Fullana M, Zhu X, Alonso P, et al. Basolateral amygdala–ventromedial prefrontal cortex connectivity predicts cognitive behavioural therapy outcome in adults with obsessive–compulsive disorder. *J Psychiatry Neurosci* 2017.

DOI: 10.1503/jpn.160215

*Online appendices are unedited and posted as supplied by the authors.*

**Supplementary Table 3. Regression models predicting CBT outcome in OCD patients (n=73) with BLA-ACC rs-fc as predictor**

Outcome: CBT response (yes/no). Binomial logistic regression model

| Predictors     | Wald  | OR*   | P    | 95% CI     |
|----------------|-------|-------|------|------------|
| Sex            | 1.826 | 1.138 | .177 | .944-1.372 |
| Age            | .088  | 1.002 | .766 | .991-1.012 |
| YBOCS baseline | 5.018 | .974  | .025 | .951-.997  |
| HDRS baseline  | .013  | .998  | .908 | .968-1.030 |
| BLA-ACC rs-fc  | .151  | 1.106 | .698 | .665-1.838 |

Outcome: Post-CBT YBOCS. Multiple regression model

| Predictors     | B*    | t      | P     | 95% CI       |
|----------------|-------|--------|-------|--------------|
| Sex            | -.315 | -1.693 | .095  | -.687-.056   |
| Age            | .002  | .201   | .841  | -.019-.023   |
| YBOCS baseline | .190  | 8.528  | <.001 | .145-.234    |
| HDRS baseline  | -.001 | -.042  | .967  | -.062-.060   |
| BLA-ACC rs-fc  | -.066 | -.131  | .896  | -1.073-0.941 |

CBT, Cognitive-behavior therapy; OCD, Obsessive-compulsive disorder; YBOCS, Yale–Brown Obsessive-Compulsive Scale; HDRS, Hamilton Depression Rating Scale; BLA-ACC rs-fc, Basolateral amygdala-anterior cingulate cortex resting-state functional connectivity; OR, odds ratio.

\*OR and multiple regression coefficients are reported for one standard deviation increase in the predictor
